# Supplementary material for: Structure and Interdomain Interactions of a Hybrid Domain: A Disulphide-Rich Module of the Fibrillin/LTBP Superfamily of Matrix Proteins
Source: PubMed Central journal article supplement (PMC2724076; doi:10.1016/j.str.2009.03.014), 2009-05-13
Supplement: mmc1.pdf [file mmc1.pdf]

## Supplemental Data

## Structure and Interdomain Interactions of a Hybrid Domain: A Disulphide-Rich Module of the Fibrillin/LTBP Superfamily of Matrix Proteins

Sacha A. Jensen, Sarah Iqbal, Edward D. Lowe, Christina Redfield, and Penny A. Handford

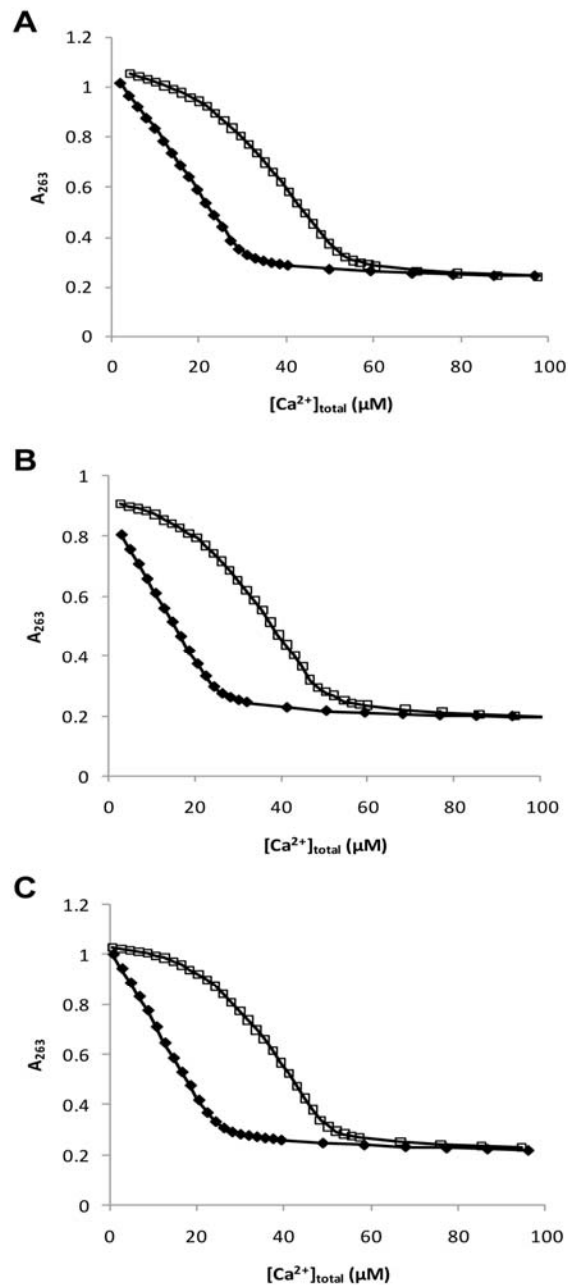

**Figure S1. Measurement of  $Ca^{2+}$  Dissociation Constants of Hyb Domain Constructs using the Chromophoric Chelator Quin-2**

Constructs were dissolved in Chelex-treated  $Ca^{2+}$ -free buffer (5 mM Tris, pH 7.5 and 150 mM NaCl) to a concentration of 25-30  $\mu M$  and titrated with  $Ca^{2+}$  in the presence of 25-30  $\mu M$  Quin-2. Curves shown are the results of titrations of chelator alone (diamonds) or chelator with protein (open squares) and are representative of the data used to determine  $K_d$  values for each construct.

(A) Titration of 29.2  $\mu M$  Quin-2 with 29.5  $\mu M$  hyb2-cbEGF10.

(B) Titration of 24.9  $\mu M$  Quin-2 with 25.0  $\mu M$  cbEGF9-hyb2-cbEGF10.

(C) Titration of 28.2  $\mu M$  Quin-2 with 29.8  $\mu M$  hyb1-cbEGF1(C204S).
